# 1 Optimization of the navigated TMS mapping algorithm 2 for accurate detection of plasticity and abnormalities in 3 cortical muscle representations

4 Dmitry O. Sinitsyn <sup>1\*</sup>, Andrey Yu. Chernyavskiy <sup>1,2</sup>, Alexandra G. Poydasheva <sup>1</sup>, Ilya S. Bakulin <sup>1</sup>,  
5 Natalia A. Suponeva <sup>1</sup>, Michael A. Piradov <sup>1</sup>

6 <sup>1</sup> Research Center of Neurology, 125367 Moscow, Russia; d\_sinitsyn@mail.ru (D.S.);  
7 andrey.chernyavskiy@gmail.com (A.C.); alexandra.poydasheva@gmail.com (A.P.); bakulinilya@gmail.com (I.B.);  
8 nasu2709@mail.ru (N.S.); mpi711@gmail.com (M.P.)

9 <sup>2</sup> Valiev Institute of Physics and Technology of Russian Academy of Sciences, 117218 Moscow, Russia

10 \* Correspondence: d\_sinitsyn@mail.ru

11 **Abstract:** Navigated TMS mapping of cortical muscle representations allows noninvasive assessment of the  
12 state of a healthy or diseased motor system and monitoring its change with time. These applications are  
13 hampered by the heterogeneity of existing mapping algorithms and the lack of detailed information about their  
14 accuracy. We aimed to find an optimal motor evoked potential (MEP) sampling scheme in the grid-based  
15 mapping algorithm in terms of the accuracy of muscle representation parameters. The APB muscles of eight  
16 healthy subjects were mapped three times on consecutive days using a seven-by-seven grid with ten stimuli  
17 per cell. The effect of the MEP variability on the parameter accuracy was assessed using bootstrapping. The  
18 accuracy of representation parameters increased with the number of stimuli without saturation up to at least  
19 ten stimuli per cell. The detailed sampling showed that the between-session representation area changes in the  
20 absence of interventions were significantly larger than the within-session fluctuations and thus could not be  
21 explained solely by the trial-to-trial variability of MEPs. The results demonstrate that the number of stimuli  
22 has no universally optimal value and must be chosen by balancing the accuracy requirements with the mapping  
23 time constraints in a given problem.

24 **Keywords:** navigated transcranial magnetic stimulation; TMS motor mapping; cortical muscle representation;  
25 bootstrapping; variability; accuracy  
26

---

## 27 1. Introduction

28 Mapping cortical motor representations of muscles using navigated transcranial magnetic stimulation  
29 (nTMS) is a valuable noninvasive method providing information about the motor system that is useful for  
30 research and clinical purposes [1–3]. Its ability to localize motor eloquent cortical areas has found successful  
31 applications in preoperative planning [4,5]. Additionally, a growing body of literature is concerned with the use  
32 of nTMS mapping for assessing the state of the motor system and its plastic changes during learning of new  
33 skills [6–9], in neurological diseases, such as stroke [10], dystonia [11], spinal cord injury [12,13], amyotrophic  
34 lateral sclerosis [14], as well as in the course of treatment [15]. For identifying the possibly subtle differences  
35 in motor maps, it is essential to make the method precise and reliable. Meanwhile, the high variability of motor  
36 evoked potentials (MEPs), on which the TMS-maps are based, makes the accurate estimation of representation  
37 parameters challenging [16–18].

38 The interpretation of the results of TMS mapping is complicated by the lack of a standard protocol and the  
39 existence of a wide variety of approaches to the mapping procedure, the selection of the studied muscle  
40 representation parameters and methods of their calculation [10,19]. One of the most frequently used approaches  
41 is based on a predefined grid of cortical points with application of a fixed number of stimuli at each point  
42 [20,21]. The studies using this method are heterogeneous in terms of the number of grid cells, their size and the  
43 number of stimuli per cell [10,21–25]. Given the high variability of MEPs, the number of stimuli per cell is an  
44 important factor influencing the accuracy of the representation parameters [20,26].

45 The reproducibility of muscle representation parameters and their stability in the absence of interventions  
46 is one of the key aspects for the application of navigated TMS motor mapping for research and clinical purposes  
47 [16,27]. The studies conducted to date have obtained divergent results with regard to the intraclass correlation  
48 coefficient (ICC) for various parameters of cortical representations, ranging from 0.36 to 0.89 [16,24,27]. A  
49 number of approaches to reducing the variability of muscle representation parameters have been proposed, such

50 as neuronavigation by an individual structural MRI for improving the repeatability of coil placement and  
51 orientation [28,29] and taking into account the individual topography and morphology of the cerebral cortex  
52 [30–32]. Another promising research direction is the brain-state dependent stimulation based on combining  
53 EEG and TMS in real time to align the stimulus times with EEG features, such as the  $\mu$ -rhythm phase [33].

54 A general approach to dealing with the trial-to-trial variability of MEPs is averaging multiple  
55 measurements [34,35]. In agreement with probability theory, the accuracy of some muscle representation  
56 parameters has been reported to increase with the number of stimuli used during the mapping [20]. However,  
57 comprehensive knowledge of this dependence for all the common parameters is lacking, and it is unknown  
58 whether the increase in the accuracy saturates (reaches a plateau) after a certain number of stimuli. This is  
59 important for estimating the payoff in the quality of the data that a researcher obtains from investing the  
60 subject's and operator's time and effort into the detailed mapping of muscle representations.

61 Another open question regarding the averaging approach is whether it can reduce to an arbitrary degree  
62 the session-to-session variability of muscle representation parameters in the absence of interventions. Averaging  
63 makes the parameters closer to their exact mean (expected) values in a given session, and these values will not  
64 necessarily be the same in a different session. Thus, it is important to test whether the variations of muscle  
65 representation parameters between sessions can be fully explained by the trial-to-trial MEP variability within a  
66 session and can thus be controlled by sufficient sampling of MEPs. An alternative scenario is the existence of  
67 systematic between-session changes of the MEP probability distributions, which cannot be influenced by the  
68 sampling scheme.

69 The existing data analysis methods in TMS mapping differ in their definitions of muscle representation  
70 parameters. The area of a representation mapped using the grid-based method has been defined as the total area  
71 of the cells with at least one suprathreshold MEP out of three stimuli [22], at least five out of ten [23], six out  
72 of ten [21,24], or two out of six [25] suprathreshold MEPs. Several studies have studied the area in which an  
73 interpolated mean amplitude function exceeds some threshold, with varying interpolation methods and  
74 thresholds [17,36,37]. Recently, a more advanced minimum-norm estimation procedure has been proposed [38].  
75 There is a need for research comparing the statistical properties of these definitions of the representation area.  
76 This can help develop guidelines for selecting an appropriate definition, possibly depending on the particular  
77 TMS mapping application.

78 The purpose of the present study was to determine the influence of the TMS mapping and data processing  
79 algorithms on the accuracy of estimating muscle representation parameters. Using a grid-based mapping  
80 approach, we studied the effect of MEP sampling, i.e. the size of the stimulation grid and the number of stimuli  
81 per cell, on the within-session accuracy and between-session variation of the muscle representation  
82 characteristics. We tested whether the between-session parameter changes could be explained by the within-  
83 session MEP variability. Additionally, we investigated the impact of the data analysis methods by comparing  
84 several alternative definitions of the representation area, weighted area and center of gravity (COG) in terms of  
85 their estimation accuracy. The results can be applied for choosing an appropriate TMS mapping algorithm for  
86 a given research or clinical problem by finding a compromise between the accuracy requirements and mapping  
87 time constraints.  
88

## 89 **2. Materials and Methods**

### 90 *2.1. Subjects and the nTMS mapping procedure*

91 For all subjects, an MRI was acquired in the T1 multiplanar reconstruction regime on a 3T Siemens  
92 MAGNETOM Verio clinical scanner. This data was used for TMS navigation.

93 The navigated TMS mapping was performed using the NBS eXimia Nexstim stimulator (Finland). We  
94 used a figure-of-eight biphasic coil with a diameter of 50 mm to deliver stimuli with a 280  $\mu$ s duration. The  
95 maximum value of the estimated induced electric field in the cortex was 199 V/m. The electromyographic  
96 (EMG) activity of the studied muscles was recorded using skin pregelled disposable electrodes (Neurosoft,  
97 Russia). A suprathreshold MEP was defined as an EMG response having a peak-to-peak amplitude greater than  
98 or equal to 50  $\mu$ V in the interval from 15 to 30 ms after the stimulus. The individual resting motor threshold  
99 (RMT) was defined as the minimum intensity of stimulation for which five out of ten stimuli produced  
100 suprathreshold MEPs. The stimulation intensity during the mapping was set to 110% of the RMT.

101 Data from two experiments were employed for answering different research questions. The first dataset  
102 was recorded previously for different purposes. It was used here to determine an optimal size of the stimulation

103 point grid for the second (main) experiment. The dataset contained 121 TMS maps for the abductor pollicis  
104 brevis (APB), extensor digitorum communis (EDC) and flexor digitorum superficialis (FDS) muscles of 33  
105 healthy subjects (21 women, median age 27, age quartiles 25, 31; nine subjects were left-handed according to  
106 the Edinburgh handedness inventory [39]). In this experiment, the locations and sequence of the stimulation  
107 points were determined individually (without a grid), taking into account the responses obtained at previous  
108 points. Each point was stimulated once, and the mapping progressed in a given direction until obtaining two  
109 points without suprathreshold MEPs.

110 In the second experiment, the cortical representations of the right APB muscle in 8 healthy volunteers (3  
111 women, median age 28, age quartiles 24, 29, all right-handed according to the Edinburgh handedness inventory  
112 [39]) were mapped three times on consecutive days. We used a stimulation point grid consisting of 7x7 square  
113 cells with a side of 7.63 mm (at the peeling depth of 20 mm), centered at the hotspot. The cells were defined  
114 with the help of the grid tool in the Nexstim stimulator software. Ten rounds of stimulation were performed,  
115 and in each round, a single stimulus was applied to the center of every grid cell in a pseudorandom order<sup>1</sup>. The  
116 total number of stimuli in every session was 490. All three sessions were performed with the same intensity  
117 equal to 110% of the individual RMT determined in the first session. The coil orientation was tangential to the  
118 surface of skull, and the induced electrical field was perpendicular to central sulcus, in the posterior to anterior  
119 direction.

120 The study was approved by the Ethical Committee of Research Center of Neurology (protocol 9-4/17,  
121 30.08.2017), and written informed consent was obtained from all the participants.

122

## 123 2.2. Data analysis

### 124 2.2.1. Muscle representation coverage by grids of different sizes

125 Because the first dataset was acquired without a stimulation grid, the sizes of the obtained representations  
126 were not constrained from above and provided a sample from the size distribution in the healthy population.  
127 Thus, the maps were used to estimate the fractions of the representations that would be covered by square grids  
128 of different sizes centered at the point with the maximum MEP amplitude. Conservative estimates were used,  
129 counting only the parts of the representations that were guaranteed to be covered under any grid orientation (i.e.  
130 lying within a circle of a radius equal to half the side of the square). The calculations were performed for the  
131 following grid sizes: 38, 46, 53, 61 and 69 mm (corresponding to 10, 12, 14, 16 and 18 cells in the Nexstim grid  
132 tool) at the peeling depth of 20 mm. The results were compared between the three muscles using the Kruskal-  
133 Wallis test.

134

### 135 2.2.2. Muscle representation parameters

136 We calculated the following muscle representation parameters (the formulas are presented in Appendix  
137 A):

- 138 1. the area of the cells with the mean MEP above 50  $\mu$ V;
- 139 2. the area of the cells with the maximum MEP above 50  $\mu$ V (or, equivalently, the area of the cells with  
140 at least one suprathreshold MEP);
- 141 3. the area of the cells with more than half suprathreshold MEPs;
- 142 4. the area weighted by the mean MEP amplitude (amplitude-weighted area, also known as map volume  
143 [17]);
- 144 5. the area weighted by the probability of a suprathreshold MEP (probability-weighted area);
- 145 6. the COG with the weights defined as the mean amplitudes in each grid cell;
- 146 7. the COG with the weights defined as the maximal amplitudes in each grid cell;
- 147 8. the COG with the weights defined as the probabilities of suprathreshold MEPs in each grid cell.

148

### 149 2.2.3. Simulation of mapping with different numbers of stimuli using bootstrapping

---

<sup>1</sup> In a small number of cases, due to operator error, the number of stimuli in a particular grid cell differed from ten, being equal to 9 in 7% of the cells, 11 in 4% and 7, 8 or 12 in less than 1% of the cells. The bootstrapping-based accuracy estimates did not significantly depend on such small variations, which was checked by repeating the calculations using the first eight stimuli in each cell for all the maps.

150 To simulate the mapping results that would be obtained with a different number of stimuli per grid cell,  
151 we used a bootstrapping-based method, in which we randomly chose (with replacement) a given number of  
152 values from the 10 amplitudes measured in each cell. The resulting sets of amplitudes were treated as maps,  
153 and their parameters were calculated in the same way as for the initial full datasets. Sampling with replacement  
154 allows one to simulate arbitrary numbers of stimuli per cell (not necessarily smaller than 10). We performed  
155 the calculations for the numbers of stimuli from 1 to 10. The last value corresponds to estimating the accuracy  
156 of the representation parameters for our actual protocol. The number of bootstrapping-generated maps was  
157 equal to 1000 for every condition.

#### 158 159 *2.2.4. Bias of the area and weighted area*

160 An important and often overlooked fact is that the accuracy of an estimator is determined not only by its  
161 variance but also by the bias, i.e., the difference between the mean value of the estimator and the true value of  
162 the estimated parameter. It is necessary to characterize the bias because it can produce spurious effects and  
163 make the results obtained using different mapping protocols difficult to compare [40]. The evaluation of the  
164 bias is complicated by the inaccessibility of the ‘true values’ of the muscle representation parameters, i.e. those  
165 that would be obtained from a hypothetical mapping providing the full knowledge of the MEP probability  
166 distributions at every cortical location.

167 Our approach to estimating both the bias and variability of representation parameter estimates is based on  
168 bootstrapping [41]. Mathematically, the method simulates the mapping results for a muscle representation in  
169 which the actual probability distributions of MEP amplitudes in each cell coincide with the empirical  
170 distributions obtained in the experiment. It is important, however, that the validity of the estimates does not  
171 require exact equality between the empirical and the real MEP distributions, but is based on their approximate  
172 similarity, which can be expected with the ten-stimulus sampling.

173 The normalized (relative) bias was estimated by the following formula:

$$174 \quad B_{norm}(P) = \frac{mean(P) - P_0}{P_0},$$

175 where  $P$  is a muscle representation parameter (such as the area),  $P_0$  is the parameter value for the experimental  
176 map, and  $mean(P)$  is the mean parameter value over the maps generated by bootstrapping with a certain  
177 number of stimuli per grid cell (ranging from one to ten).

#### 178 179 *2.2.5. Within-session variability of the area and weighted area*

180 The within-session variability of muscle representation parameters was characterized by the coefficient of  
181 variation (CV) of the parameter values for the maps generated by bootstrapping from a given experimental map:

$$182 \quad CV(P) = \frac{std(P)}{mean(P)},$$

183 where  $std(P)$  is the sample standard deviation for the bootstrapping-generated maps.

#### 184 185 *2.2.6. Between-session variability of the area and weighted area*

186 The variability of muscle representation parameters between the three mapping sessions was characterized  
187 by a variability index equal to one-half of the relative difference of the maximum and minimum values:

$$188 \quad V(P) = \frac{P_{max} - P_{min}}{P_{max} + P_{min}},$$

189 where  $P_{max}$  and  $P_{min}$  are maximal and minimal values of the parameter in the three sessions. This quantity  
190 measures the relative deviation of these values from their mean. The values of this index were calculated and  
191 averaged by 1000 triples of maps generated by bootstrapping from the three mapping sessions.

#### 192 193 *2.2.7. Sensitivity of the protocol to changes between sessions*

194 The MEP amplitudes in the three mapping sessions were compared in a cell-by-cell manner. Importantly,  
195 only the amplitudes above 50  $\mu$ V could be reliably detected. Thus, the values of all smaller responses were  
196 unknown - a situation called ‘data censoring’ in statistics [42]. Accordingly, the samples of MEP amplitudes  
197 from every grid cell were compared between the sessions using Gehan’s generalization of the Mann-Whitney

198 test for censored data [43]. To compare the within-session and between-session variability of MEPs, we  
199 performed similar tests between the two halves of each sample obtained in a given session (five MEPs in each  
200 half for every grid cell). To keep the same statistical power in the between-session tests, we limited them to the  
201 first half of each session (five MEPs per grid cell). The test results were visualized using 2D diagrams showing  
202 the locations of significant amplitude changes at uncorrected  $p < 0.05$ . The diagrams are analogous to statistical  
203 parametric maps in neuroimaging [44].

204 To assess whether the representation parameter changes between sessions had the same magnitude as the  
205 within-session fluctuations, the parameter distributions for maps generated by bootstrapping from each session  
206 were computed. The degree of similarity between pairs of distributions was measured by the overlaps of their  
207 histograms, with unit overlap corresponding to identical distributions and zero overlap - to completely  
208 incompatible distributions, with no common possible values. If the distributions in two sessions had a small  
209 overlap, this was interpreted as a significant change of the parameter between sessions, which could not be  
210 explained by the within-session variability.

211 In addition to the overlap values, it is useful to characterize the parameter heterogeneity in different  
212 sessions by a single number. To this end, we calculated the intraclass correlation coefficient (ICC) applied to  
213 the three parameter samples generated by bootstrapping from each session. We used the version of the ICC for  
214 the one-way random effects model [45] because the ordering of bootstrapping-generated maps is irrelevant. We  
215 call the resulting quantity the *bootstrapping-based between-session intraclass correlation coefficient* (BICC).  
216 In a given subject, this index measures the proportion of the parameter variance attributable to systematic  
217 session differences. Zero BICC corresponds to a situation in which the changes between sessions can be fully  
218 explained by the variability within a session, and high BICC indicates stronger variation between than within  
219 sessions. This measure should be distinguished from the ICC applied in the way common in reliability studies,  
220 where it is computed for the sets of values obtained in different subjects and quantifies the ability to distinguish  
221 the characteristics of different individuals in the presence of variability [45]. Conversely, BICC is calculated  
222 for a single subject and measures the ability to discriminate between sessions in the presence of within-session  
223 inaccuracy.

224

#### 225 2.2.8. Accuracy of the center of gravity

226 The accuracy of the COG was measured by the mean distance between the COG calculated from the  
227 experimental map and the COGs of 1000 maps generated by bootstrapping.

228

### 229 3. Results

#### 230 3.1. Muscle representation coverage by grids of different sizes

231 For every percentage value X, we calculated the fraction of all healthy subjects for whom at least X per  
232 cent of their representation is covered by the grid of a given size (Fig. 1). This analysis was performed for the  
233 maps from the first dataset obtained without a grid. The coverage fractions were not significantly different  
234 between the three muscles (APB, EDC and FDS) for every grid size ( $p > 0.05$ , Kruskal-Wallis test). Based on  
235 this analysis, we selected for the main experiment a grid size of 53 mm (14 cells in the Nexstim grid tool),  
236 covering on average 97.9% of the area of the representations.



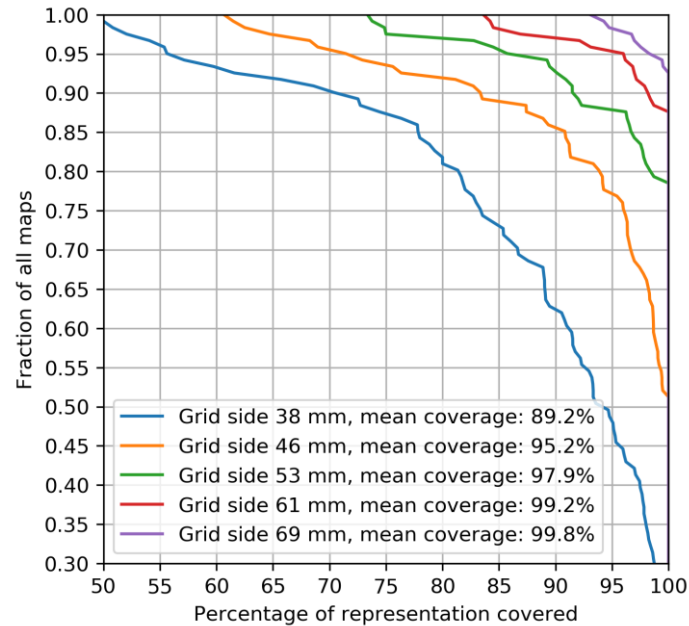

237

238

239

240

241

242

243

244

245

246

247

248

**Figure 1.** The effect of the grid size on the completeness of muscle representation coverage. For every percentage value X, the corresponding Y value is the fraction of all the maps in which at least X per cent of the representation is covered by the grid of a given size. The simulated grids were located at the peeling depth of 20 mm, centered at the point with the maximum MEP amplitude, had a square shape, and their side lengths were chosen as even integer multiples of a cell in the Nexstim grid tool (10 to 18 cells). The TMS maps used in this calculation were obtained without a grid in healthy subjects (13 maps for APB, 54 for EDC, and 54 for FDS). There was no significant difference in the representation size between the muscles for every grid size ( $p > 0.05$ , Kruskal-Wallis test). Note: The estimates of the coverage are conservative in that stimulation points were counted as covered by the grid only if their distance from the hotspot was smaller than one-half of the side of the grid (i.e. excluding the coverage by the corners of the square, which is possible, but not guaranteed under varying grid orientations). The green line corresponds to the grid size used in the present study.

249

250

### 3.2. Visualization of TMS maps obtained with a stimulation grid

251

252

253

254

255

The mapping results from the grid-based experiment were visualized by representing each grid cell by a square with the color defined by the fraction of the 10 stimuli that produced a suprathreshold MEP (Fig. 2A). The muscle representations were generally composed of a region of varying size having a high probability of a suprathreshold response (0.9 and above, colored yellow) and a surrounding area with an intermediate probability (ranging from 0 to 0.9, colored green to dark violet).

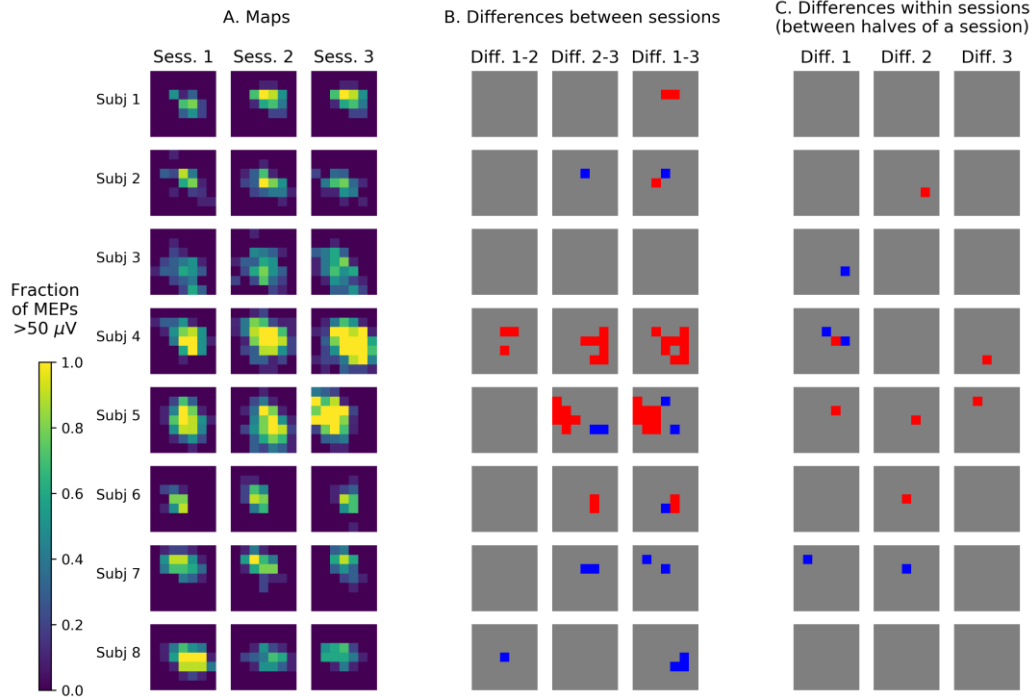

256

257

258

259

260

261

262

263

**Figure 2.** A. TMS maps of the APB muscle from three sessions performed on consecutive days. The squares represent the stimulation grid cells, and the color encodes the fraction of the applied 10 stimuli that produced suprathreshold MEPs (above 50  $\mu$ V). B. Results of the comparison of the first five MEP amplitudes in each cell between sessions using Gehan's generalization of the Mann-Whitney test for censored data. The red cells had significantly greater amplitudes in the second session of the compared pair (with uncorrected  $p < 0.05$ ), and the blue cells - significantly smaller amplitudes. C. Results of the comparison of the first and the second five MEP amplitudes in each cell. The test and the color code are the same as in B.

264

265

### 3.3. Bias of the area and weighted area

266

267

268

269

270

271

272

273

274

275

276

277

The biases of the different variants of the area and weighted area were calculated using the bootstrapping-based map simulation, and their median values from all sessions in all subjects are shown in Fig. 3 as functions of the number of stimuli per grid cell. A considerable bias exists in the (unweighted) area parameters, which were defined using thresholding: the area of the cells with the mean MEP above 50  $\mu$ V, the area of the cells with the maximum MEP above 50  $\mu$ V and the area of the cells with more than half suprathreshold MEPs. In contrast, the amplitude-weighted area and probability-weighted area have very small biases.

For the area of the cells with more than half suprathreshold MEPs, the bias showed different patterns for even and odd numbers of stimuli per cell, shown separately by the solid and dashed green lines respectively. Moreover, as shown in Appendix C, for particular structures of the representations, the bias of this parameter can be a non-monotonic function of the number of stimuli. The sign of the bias can be negative or positive, depending in a non-trivial way on the details of the representation and the number of stimuli. This suggests interpreting this parameter with caution.

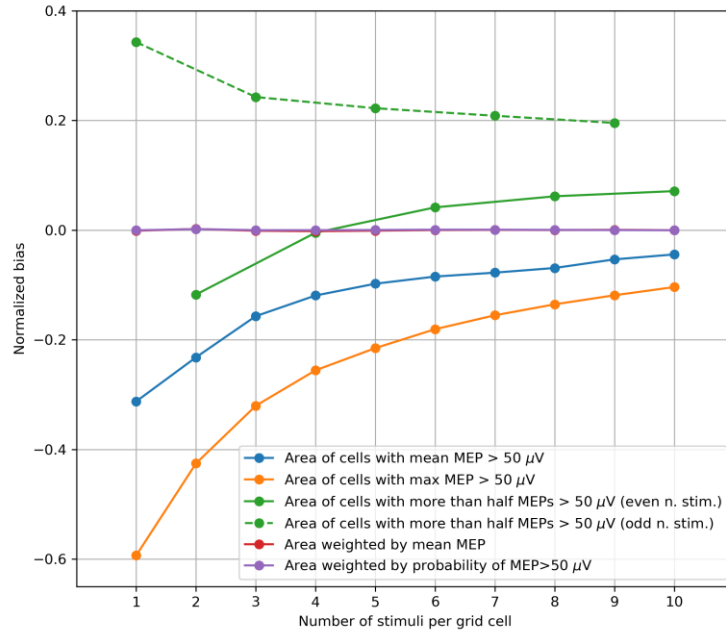

278

279

280

281

282

283

284

285

**Figure 3.** The dependence of the normalized bias of the representation parameters on the number of TMS stimuli per grid cell. The values of the parameters were averaged by 1000 maps generated by bootstrapping (with replacement) from every experimental map obtained with 10 stimuli per cell in each subject. The median values from all maps of all subjects are depicted. The area of the cells with more than half suprathreshold MEPs showed different patterns for even and odd numbers of stimuli per cell, shown by the solid and dashed green lines respectively (here and in Figs. 4, 5). The biases of the mean amplitude-weighted and probability-weighted areas (red and purple curves) are close to zero.

286

287

### 3.4. Within-session variability of the area and weighted area

288

289

290

291

292

The within-session CVs were calculated using the same method as the biases and plotted depending on number of stimuli per grid cell in the maps generated by bootstrapping (Fig. 4). For all the parameters, the CV significantly decreased with the number of stimuli per cell ( $p < 0.001$ , Page's trend test for ordered alternatives). The parameters having the smallest CVs were the area of the cells with at least one suprathreshold MEP and the probability-weighted area.

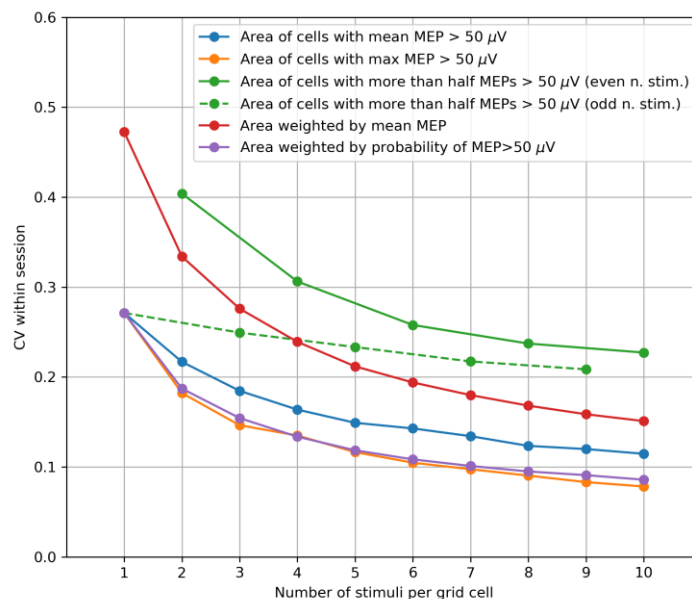

293



294 **Figure 4.** Within-session variability of area parameters measured by the coefficient of variation (CV) of the  
295 parameter values obtained in 1000 maps generated by bootstrapping from every initial 10-stimuli-per-cell map  
296 of every subject. The median values of the CVs from all maps of all subjects are depicted. For all the parameters,  
297 the CV significantly decreases with the number of stimuli per cell ( $p < 0.001$ , Page's trend test for ordered  
298 alternatives).

299  
300 The probability-weighted area was characterized by the highest overall accuracy among the considered  
301 definitions of the area and weighted area, having a negligible bias and a small CV. This parameter was selected  
302 for further analysis of its sensitivity to the between-session map changes (section 3.6).  
303

### 304 3.5. Between-session variability of the area and weighted area

305 The between-session variability index demonstrated a pattern similar to that of the within-session CV (Fig.  
306 5). The variability index significantly decreases with the number of stimuli per cell ( $p < 0.001$ , Page's trend test)  
307 for all the parameters except the area of the cells with more than half suprathreshold MEPs, which can have a  
308 non-monotonic, subject-dependent bias and should be interpreted with caution (see Appendix C). The  
309 parameters with the smallest between-session variability were the area of the cells with at least one  
310 suprathreshold MEP and the probability-weighted area (the same parameters that had the smallest within-  
311 session CV) as well as the area of the cells with the mean MEP above  $50 \mu\text{V}$ .

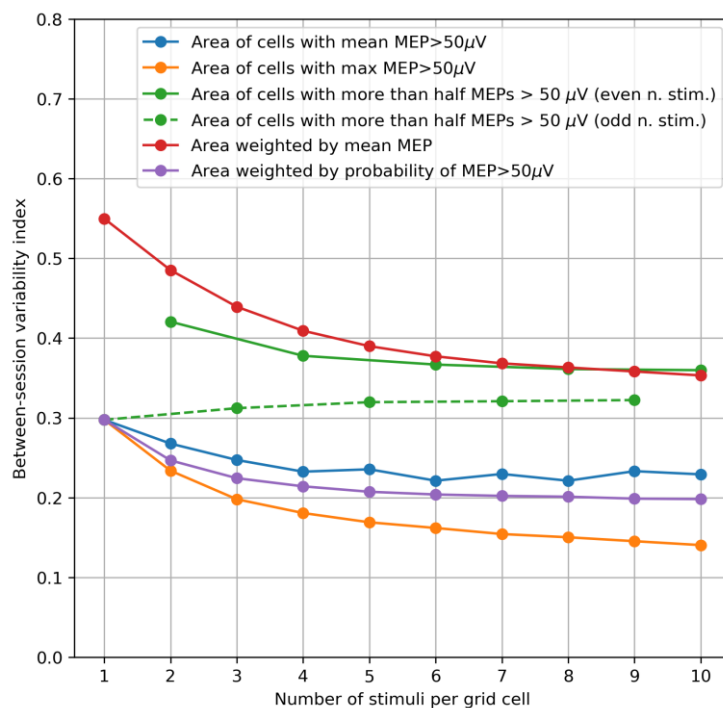

312  
313 **Figure 5.** Between-session variability of the area parameters measured by an index equal to one-half of the  
314 relative difference of the maximum and minimum values among the three mapping sessions performed on  
315 consecutive days. These indices were calculated and averaged by 1000 triples of maps generated by  
316 bootstrapping from the MEPs obtained in the three sessions. The median values from all subjects are shown in  
317 the plot. The variability index significantly decreases with the number of stimuli per cell ( $p < 0.001$ , Page's trend  
318 test) for all the parameters except the area of the cells with more than half suprathreshold MEPs, which can have  
319 a non-monotonic, subject-dependent bias and should be interpreted with caution (see Appendix C).

### 320 3.6. Sensitivity of the protocol to changes between sessions

322 The results of the amplitude comparisons for each grid cell between the first halves of pairs of sessions  
323 and between the first and second halves of each session indicate that, on average, the number of significant  
324 changes was greater between sessions than within a session (Fig. 2 B,C).

325 The relationship between the within-session and between-session variability of the probability-weighted  
326 area was characterized by calculating its probability distributions for the maps generated by bootstrapping from  
327 each session (Fig. 6). Five of the eight subjects had a between-session distribution overlap of less than 0.05 in  
328 at least one pair of sessions, indicating a significant difference in the probability-weighted area.

329 We quantified the ability to distinguish the values of the probability-weighted area between sessions using  
330 the BICC, i.e. the intraclass correlation coefficient applied to the three parameter samples generated by  
331 bootstrapping from each session. The BICC ranged from 0.61 to 0.99. High BICC values (above 0.9) were  
332 observed in the three subjects (with numbers 4, 5 and 8) who had zero distribution overlaps in some pairs of  
333 sessions. Both measures indicate that in these subjects, the between-session changes of the probability-weighted  
334 area were greater than the within-session fluctuations and thus were unlikely to be explainable solely by the  
335 trial-to-trial variability of MEPs.

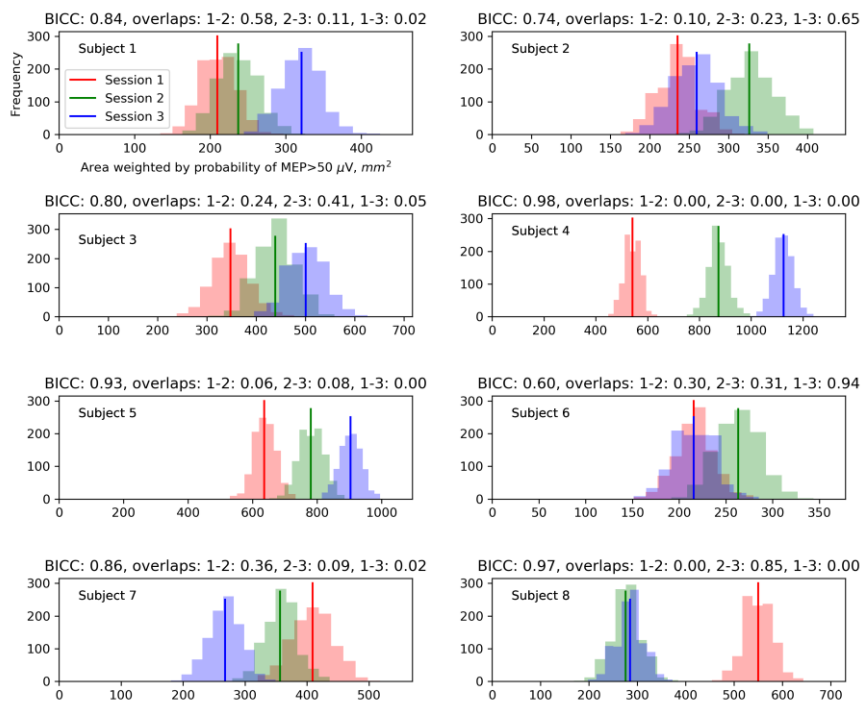

336

337 **Figure 6.** Comparison of the between-session and within-session variability for the probability-weighted area  
338 (sum of grid cell areas multiplied by the probabilities of suprathreshold MEPs in them). Each plot corresponds  
339 to one subject and shows three histograms for different mapping sessions. Each histogram shows the within-  
340 session distribution of the values of the probability-weighted area obtained from 1000 maps generated by  
341 bootstrapping from a given map. Above the plots, the measures of the possibility to discriminate between  
342 sessions are shown: the bootstrapping-based between-session intraclass correlation coefficient (BICC) and the  
343 pairwise distribution overlaps.

344 Additionally, to compare the alternative definitions of the area and weighted area by their ability to find  
345 significant differences between sessions at the individual level, we computed the BICC values for all the  
346 parameters and all subjects (Fig. 7). In five of the eight subjects, the highest BICC was shown by the probability-  
347 weighted area, and in the remaining three subjects – by the amplitude-weighted area.  
348

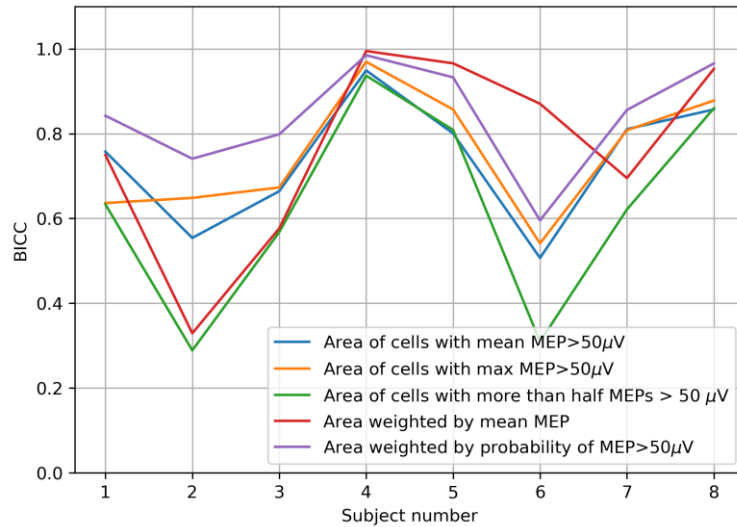

349

350

351

**Figure 7.** Bootstrapping-based between-session intraclass correlation coefficient (BICC) calculated for all the area and weighted area variants in all subjects.

352

353

### 3.7. Accuracy of the center of gravity

354

355

356

357

358

359

The COG accuracy was measured by the mean distance between the COG calculated from the initial map with 10 stimuli per cell and the COGs of 1000 maps generated by bootstrapping. The results are shown in Fig. 8 depending on number of stimuli per grid cell in the bootstrapping-generated maps. For all the COG variants, this error measure significantly decreased with the number of stimuli ( $p < 0.001$ , Page's trend test). The highest accuracy was obtained for the probability-weighted COG, although the accuracy differences with the other two definitions were small (less than 1 mm).

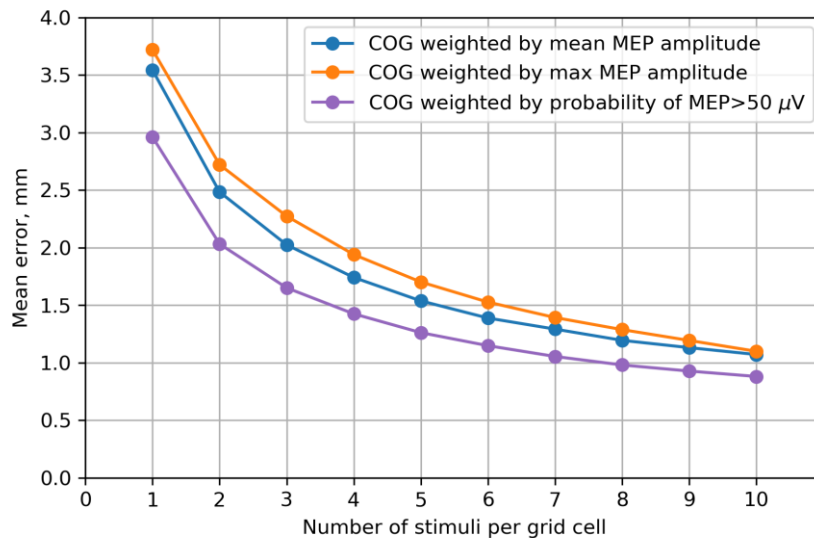

360

361

362

363

364

365

366

367

368

**Figure 8.** Accuracy of the COG estimates computed using three alternative methods of assigning weights to the stimulation points. The accuracy is measured by the mean distance between the COG calculated from the full map and the COGs of 1000 maps generated by bootstrapping. The median values from all maps of all subjects are shown. The differences in the COG accuracy between the three methods are statistically significant for all numbers of stimuli smaller than 8 ( $p < 0.05$ , Friedman test). The highest accuracy is achieved by the approach in which the stimulus location vectors are weighted by the probability of a suprathreshold MEP in them (purple curve), although the accuracy differences between the methods are small (less than 1 mm). For all the COG variants, the error significantly decreases with the number of stimuli per cell ( $p < 0.001$ , Page's trend test).

## 369 4. Discussion

370 We have studied the impact of the TMS mapping algorithm and data processing on the accuracy of  
371 estimating muscle representation parameters. The considered aspects of the mapping procedure were the size  
372 of the stimulation grid and the number of stimuli per cell. As regards data processing, several alternative  
373 definitions of the muscle representation area, weighted area and COG were compared in terms of the accuracy  
374 of their estimation. Among the considered variants of area and weighted area, the highest overall accuracy was  
375 shown by the area weighted by the probability of a suprathreshold MEP. This parameter was further investigated  
376 with respect to its sensitivity to the motor map changes between the three sessions recorded on consecutive  
377 days. The results show that such changes can be greater than the fluctuations within a session, and thus can be  
378 reliably detected in individual subjects using the present protocol. The causes of these changes, including  
379 possible physiological and methodological explanations, require further research.

### 380 4.1. Muscle representation coverage by grids of different sizes

382 The optimal choice of the stimulation grid size has rarely been discussed in the literature. Classen et al.  
383 [20] calculated the increasing accuracy of the COGs obtained using square grids with side lengths of 3, 5 and 7  
384 cm. Since the main expected effect of an insufficiently large grid is likely to be the missing of some excitable  
385 sites at the periphery, we based our analysis on the percentage of the points with suprathreshold MEPs covered  
386 by a grid. The obtained dependence of this characteristic on the grid dimensions can be used to choose an  
387 appropriate size that is large enough to ensure the required representation coverage. At the same time, an  
388 unnecessarily large grid is undesirable due to the increased mapping time (if the stimulation point density is  
389 fixed).

### 390 4.2. Visualization of TMS maps obtained with a stimulation grid

392 The mapping protocol used in this study produced samples of 10 MEP amplitudes from every grid cell in  
393 each session. This allowed a statistical comparison of the maps in a cell-by-cell manner - an approach that is  
394 widespread in MRI-based neuroimaging, but not so common in TMS mapping (although is occasionally applied  
395 [7]). We found a considerable number of significant changes of amplitude distributions between sessions and  
396 visualized the spatial configurations of these effects. Significant changes between sessions were more numerous  
397 than alterations within a session (i.e. between its first and second halves). This motivates further application of  
398 the described methodology for testing location-specific MEP changes with and without interventions based on  
399 the MEP samples of considerable size obtained in each grid cell in different mapping sessions.

### 400 4.3. Bias of the area and weighted area

402 One of the problems in the field of TMS mapping is the difficulty of comparing results obtained by  
403 different groups using a variety of mapping protocols and data processing methods. The performed analysis of  
404 the biases of the different variants of area and weighted area indicates that the values of the thresholding-based  
405 (unweighted) area definitions have considerable biases. This means that these parameters can systematically  
406 differ between protocols with different numbers of stimuli per grid cell. Additionally, every subject is  
407 characterized by a particular bias, depending on the details of the MEP probability distributions in all the grid  
408 cells (see Appendix B). This means that the influence of the bias cannot be eliminated by a single bias correction  
409 procedure. Moreover, if a study applying TMS mapping with a limited number of stimuli compares the  
410 representation areas in two groups with systematically different area biases, a totally spurious difference in the  
411 area can be obtained. The amplitude-weighted and probability-weighted areas have negligible biases, and thus  
412 do not present the above problems.

413 It should be stressed, however, that the choice of the parameters to focus on in a given study cannot be  
414 based solely on their accuracy. Indeed, a parameter may be estimated very accurately, but show no effect in the  
415 considered problem. Thus, all muscle representation characteristics can potentially be informative, particularly  
416 if their statistical properties are understood and taken into account.

### 417 4.4. Within-session variability of the area and weighted area

419 The extreme variability of MEP amplitudes (which can span more than two orders of magnitude [46])  
420 leads to the within-session variability of muscle representation parameters [35]. The characteristics considered

421 here involve integration of data from repeated stimulation of many cortical locations, which makes the  
422 representation parameters more stable than a single MEP. This effect of stabilization due to averaging was  
423 found to vary depending on the exact definition of the representation area or COG. We estimated the variability  
424 using a bootstrapping-based method, in which we simulated maps by subsampling MEPs from the datasets  
425 recorded in the experiment.

426 The results show that the three alternative definitions of the muscle representation area produce different  
427 degrees of relative variability (measured by the CV). One of the variants is the area of the cells with at least 6  
428 suprathreshold MEPs (out of 10 stimuli), which was recommended in the protocol proposed in [21] and named  
429 “the golden standard” in [40]. This parameter had a larger CV than the other two (unweighted) area variants:  
430 the area of the cells with the mean MEP above 50  $\mu\text{V}$  and the area of the cells with at least one suprathreshold  
431 MEP. As noted above, this does not imply that any of the parameters should not be used, because although all  
432 the three area variants depend on the representation extent, they do not measure exactly the same property and  
433 may be sensitive to different effects of interest. The higher variability of the area of the cells with at least 6  
434 suprathreshold MEPs leads to the requirement of larger effect sizes and/or samples for statistical significance  
435 as compared to the other two area definitions. Thus, it is important to take into account the accuracy of the  
436 different parameters for planning the experiments, even though the accuracy cannot serve as the only basis for  
437 parameter selection.

438 The probability-weighted area has the highest overall accuracy among the area and weighted area variants.  
439 It depends on both the extent of the representation and the distributions of MEPs at the included points. Further  
440 studies are warranted to assess the utility of this parameter in fundamental and clinical problems.

441 The obtained decreasing dependencies of errors on the number of stimuli per grid cell can be used for  
442 appropriately choosing this number in a given application of TMS mapping. A compromise should be reached  
443 between the requirements for high accuracy and reasonable study duration. Several methodological studies of  
444 TMS mapping have focused on the number of stimuli sufficient for reliable estimation of representation  
445 parameters [20,26,34,36,40,47], and their results may be considered to mean that any further increase in this  
446 number is pointless. The obtained dependencies (Fig. 4) demonstrate that, although the slopes are largest in the  
447 left parts of the curves, the errors continue to decrease for all the considered numbers of stimuli. Thus, a study  
448 with a small effect size may benefit from a larger number of stimuli than the minimum one required for  
449 reliability.

450 High parameter accuracy may be especially relevant to investigations of the changes in TMS maps  
451 between two time points due to an intervention or spontaneous directed alteration such as disease progression.  
452 In such a study, the measured change of a parameter is composed of (1) the constant mean effect of interest, (2)  
453 the random change in the mean parameter value between the sessions and (3) the within-session random errors.  
454 The error terms (2) and (3) can contain both physiological components (such as excitability fluctuations) and  
455 methodological factors (e.g., navigation inaccuracies). The ability to detect the effect (i.e. the statistical power)  
456 depends on its size in relation to the error terms (2) and (3). The purpose of sufficient MEP sampling studied in  
457 this paper is to reduce the component (3) so that it is small compared to the component (2) and thus does not  
458 limit the statistical power. Meanwhile, it is known that the between-session variability (2) is smaller than the  
459 between-subject variation, as indicated by the reported ICC values above 0.5 [47,48]. Thus, even a small  
460 accuracy gain irrelevant for group comparisons may be essential in pre-post studies.

#### 461 462 *4.5. Between-session variability of the area and weighted area*

463 Similarly to the within-session CV, the between-session variability indices of the area and weighted area  
464 decreased with the number of stimuli. However, this decrease showed a more pronounced flattening for numbers  
465 of stimuli greater than five, in comparison with the decrease of the CV. This is in agreement with the  
466 interpretation that increasing the number of stimuli reduces the effect of the short-term MEP variability and  
467 brings representation parameters closer to their mean values in a particular session, but these mean values may  
468 differ between sessions due to physiological and/or methodological factors. This means that the between-  
469 session variability will approach a (nonzero) plateau determined by the differences between the mean values in  
470 the sessions. In other words, it is impossible to eliminate the between-session changes by collecting more data  
471 in each session.

472 The relationships between the alternative area definitions were similar to those observed for the within-  
473 session CV, with two exceptions. First, the CV was smaller for the amplitude-weighted area than the area of  
474 the cells with more than half suprathreshold MEPs, whereas their between-session variability indices were



475 similar. Second, the between-session variability was higher for the probability-weighted area than the area of  
476 the cells with at least one suprathreshold MEP, whereas their CVs were similar. This may correspond to a  
477 greater day-to-day stability of the representation ‘footprint’ (the area of the region able to produce MEPs) than  
478 its ‘height’ in terms of MEP probability (i.e. the average degree of certainty with which a suprathreshold  
479 response will be elicited in each location).

480

#### 481 4.6. Sensitivity of the protocol to changes between sessions

482 An optimal TMS mapping protocol for a given study must be sensitive to the effect being investigated. As  
483 mentioned above, an important type of research question concerns the changes of TMS maps with time, e.g. in  
484 the course of disease progression [14] or as a result of neuroplasticity caused by therapeutic interventions [15].  
485 To reliably detect such changes at the level of individual subjects, the within-session variability should be small  
486 compared to the between-session effect size. In the present study, we compared three mapping sessions without  
487 any interventions between them. The changes in the probability-weighted area between the consecutive days  
488 were shown to be greater than the within-session fluctuations. This suggests that the day-to-day changes in this  
489 parameter cannot be fully explained by the inaccuracy produced by the trial-to-trial MEP amplitude variability.

490

#### 491 4.7. Accuracy of the center of gravity

492 Similarly to the CV of the extent-related representation parameters, the within-session errors in the center  
493 of gravity decreased with the number of stimuli. They were within the nominal accuracy of the navigation  
494 system (5.7 mm). The probability-weighted COG showed a slightly higher accuracy than the COGs weighted  
495 by the mean and maximum MEPs, which may be due to its independence of large fluctuations in the MEP  
496 amplitudes known to have a heavy-tailed distribution [46].

497

## 498 5. Conclusions

499 We have studied the dependence of the accuracy of muscle representation parameters on the aspects of the  
500 grid-based TMS mapping experiment and data processing. The grid size impacted the completeness of the  
501 muscle representation coverage, and a square grid with a side of 53 mm (at the peeling depth of 20 mm) centered  
502 at the hotspot covered on average 97.9% of the representation area for the APB, EDC and FDS muscles. The  
503 within-session accuracy of the representation area, weighted area and COG improved with the increasing  
504 number of stimuli without saturation up to at least ten stimuli per cell. For the area definitions based on  
505 thresholding, a considerable bias was observed for small numbers of stimuli, while for the probability-weighted  
506 and mean amplitude-weighted areas the bias was negligible. The area weighted by the probability of a  
507 suprathreshold MEP showed the highest overall accuracy among the considered definitions of the area and  
508 weighted area (surpassing the accuracy of the commonly considered area of the cells with more than half  
509 suprathreshold MEPs). The protocol was found to have sufficient sensitivity to distinguish the between-session  
510 changes of the probability-weighted area from its within-session fluctuations. The results can guide the choice  
511 of the grid size, the number of stimuli per cell and the investigated representation parameters in studies applying  
512 TMS mapping to research and clinical problems.

513

514 **Data and code availability:** The TMS mapping data and the source code of the scripts used for data processing are available  
515 at <https://github.com/DOSinitsyn/gridTMSmaps>.

516 **Funding:** This research was funded by the Russian Science Foundation, grant number 17-75-10062.

517 **Conflicts of Interest:** The authors declare no conflict of interest.

## 518 Appendix A. Formulas for the muscle representation parameters

519 The muscle representation parameters were defined by the following formulas:

520 1. The area of the grid cells with the mean MEP amplitude above 50  $\mu$ V:

521

$$A_{mean thr} = A_{cell} N_{mean thr} .$$



522 Here  $A_{cell}$  is the area of a grid cell, and  $N_{mean thr}$  is the number of cells for which  $\text{mean}(M_i) > t$ ,  
523 where  $M_i$  represents the MEP amplitudes obtained in a cell, and  $t$  is the amplitude threshold (50  $\mu\text{V}$ ).  
524 The number of the averaged amplitudes  $M_i$  is the number of stimuli per cell  $n_{stim}$ , which was equal  
525 to ten in our experimental maps and ranged from one to ten in the bootstrapping-generated maps.

526 2. The area of the cells with the maximum MEP above 50  $\mu\text{V}$  (or, equivalently, the area of the cells with  
527 at least one suprathreshold MEP):

$$A_{max thr} = A_{cell} N_{max thr} ,$$

528 where  $N_{max thr}$  is the number of cells for which  $\max(M_i) > t$ .

530 3. The area of the cells with more than half suprathreshold MEPs:

$$A_{half thr} = A_{cell} N_{half thr} ,$$

531 where  $N_{half thr}$  is the number of cells for which more than half of the stimuli produced amplitudes  
532  $M_i > t$ .

534 4. The area weighted by the mean MEP amplitude (amplitude-weighted area):

$$A_{mean w} = A_{cell} \sum_{cells} \text{mean}(M_i) .$$

536 5. The area weighted by the probability of a suprathreshold MEP (probability-weighted area);

$$A_{prob w} = A_{cell} \sum_{cells} p(M_i > t) ,$$

538 where  $p(M_i > t)$  is the fraction of all the amplitudes in a cell that are greater than  $t$ .

539 6. The COG with the weights defined as the mean amplitudes in each grid cell:

$$\vec{C}_{mean w} = \sum_{cells} (\text{mean}(M_i) \vec{r}) / \sum_{cells} \text{mean}(M_i) ,$$

541 where  $\vec{r}$  is the position vector of a cell,  $\text{mean}(M_i)$  is the mean MEP amplitude in this cell.

542 7. The COG with the weights defined as the maximal amplitudes in each grid cell;

$$\vec{C}_{max w} = \sum_{cells} (\max(M_i) \vec{r}) / \sum_{cells} \max(M_i) .$$

544 8. The COG with the weights defined as the probabilities of suprathreshold MEPs in each grid cell.

$$\vec{C}_{prob w} = \sum_{cells} (p(M_i > t) \vec{r}) / \sum_{cells} p(M_i > t) .$$

## 546 **Appendix B. Biases of the area and weighted area for the individual maps**

547 The biases of the area and weighted area variants displayed considerable dependence on the details of the MEP  
548 distributions in a particular TMS map. Figs. 9-13 show the biases of the extent-related representation parameters  
549 for each of the three sessions in every subject. The heterogeneity of the bias of each parameter precludes its  
550 elimination by a universal bias correction procedure.

551

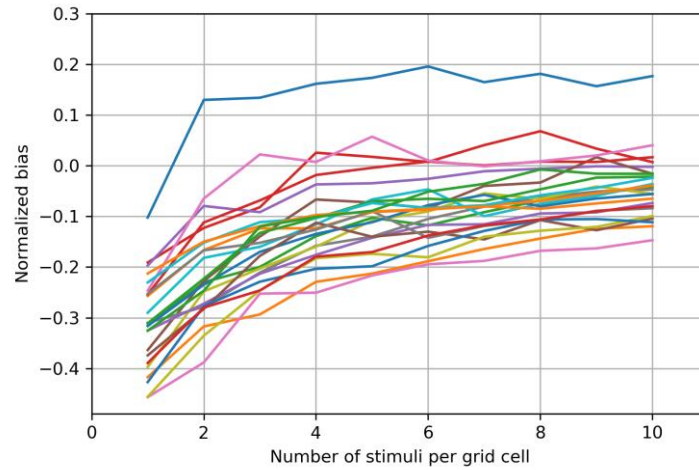

552

553

554

555

**Figure 9.** Bias of the area of the cells with the mean MEP above 50  $\mu\text{V}$  for each TMS map obtained in a given session of a particular subject, shown for all subjects and sessions. Here and below, every map corresponds to one line in the plot.

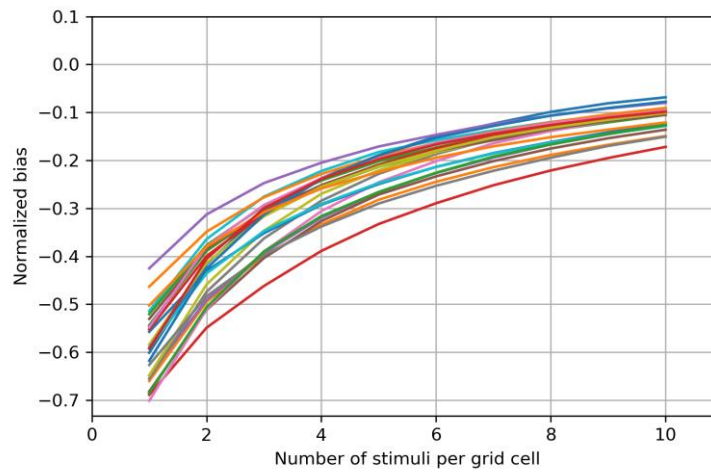

556

557

558

**Figure 10.** Bias of the area of the cells with the maximum MEP above 50  $\mu\text{V}$  for all sessions of all subjects.

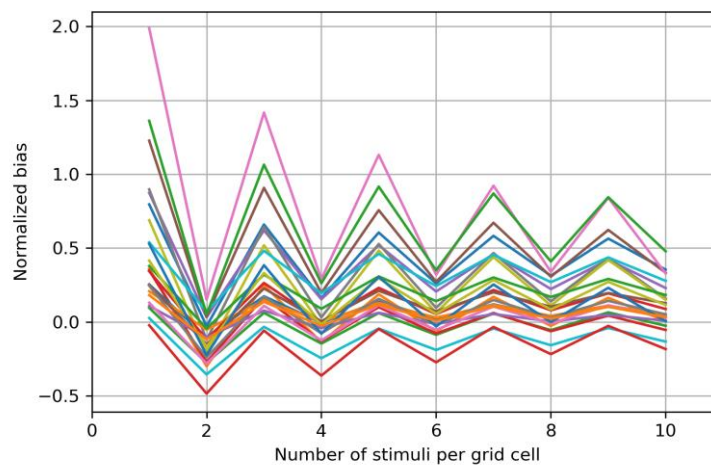

559

560

561

**Figure 11.** Bias of the area of the cells with more than half suprathreshold MEPs for all sessions of all subjects.

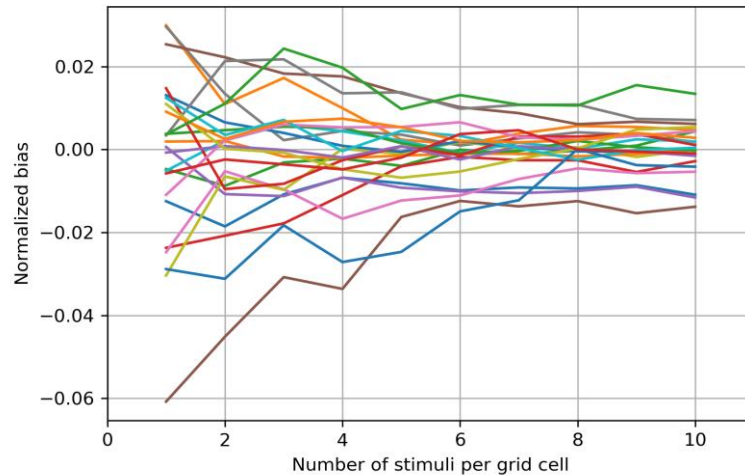

562  
563  
564

**Figure 12.** Bias of the area weighted by the mean MEP amplitude for all sessions of all subjects.

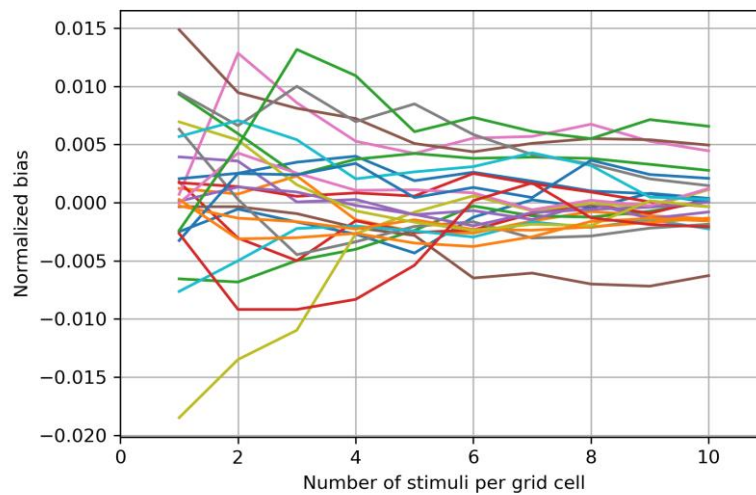

565  
566  
567

**Figure 13.** Bias of the area weighted by the probability of a suprathreshold MEP for all sessions of all subjects.

### 568 **Appendix C. Bias structure of the area of the cells with more than half suprathreshold MEPs**

569 Investigation of the area of the cells with more than half suprathreshold MEPs ( $A_{\text{half}}$ ) showed that this parameter  
570 has unintuitive statistical properties for particular structures of muscle representations. We illustrate this with  
571 the following example. Consider a muscle representation consisting of two grid cells of unit area, with the  
572 probabilities of suprathreshold MEPs equal to 0.4 and 0.7. Since one of the cells has the probability above 0.5,  
573 the true value of  $A_{\text{half}}$  is equal to 1. The mapping of this representation with  $n_{\text{stim}}$  stimuli per cell produces  
574 samples of the size  $n_{\text{stim}}$  from the Bernoulli distributions with the success probabilities of 0.4 and 0.7. The  
575 number of suprathreshold MEPs in each cell is the corresponding binomial variable. Let us define two random  
576 variables that are equal to 1 if the corresponding binomial variable is greater than  $0.5 * n_{\text{stim}}$  and 0 otherwise.  
577 These variables are Bernoullian, and their success probabilities can be calculated from the binomial  
578 distributions. The estimate of  $A_{\text{half}}$  obtained from the mapping is the sum of these variables.

579 Fig. 14A shows the dependence of the bias of the estimate of  $A_{\text{half}}$  on the number of stimuli per cell,  $n_{\text{stim}}$ . The  
580 oscillations correspond to the difference in the bias between the even and odd numbers of stimuli. If we restrict  
581 this number to be even (or odd), the dependence remains non-monotonic, with an initial increase followed by a  
582 decrease. This pattern is explained by the fact that the area estimate is the sum of the contributions of each cell.  
583 The first cell (with the suprathreshold MEP probability of 0.4) produces a mean area estimate that slowly  
584 decreases with  $n_{\text{stim}}$  (Fig. 14B), whereas the contribution of the second cell (having probability 0.7) shows a  
585 faster increase with the number of stimuli (Fig. 14C). The sum of these functions produces the complex  
586 dependence of the total area bias shown in Fig. 14A.

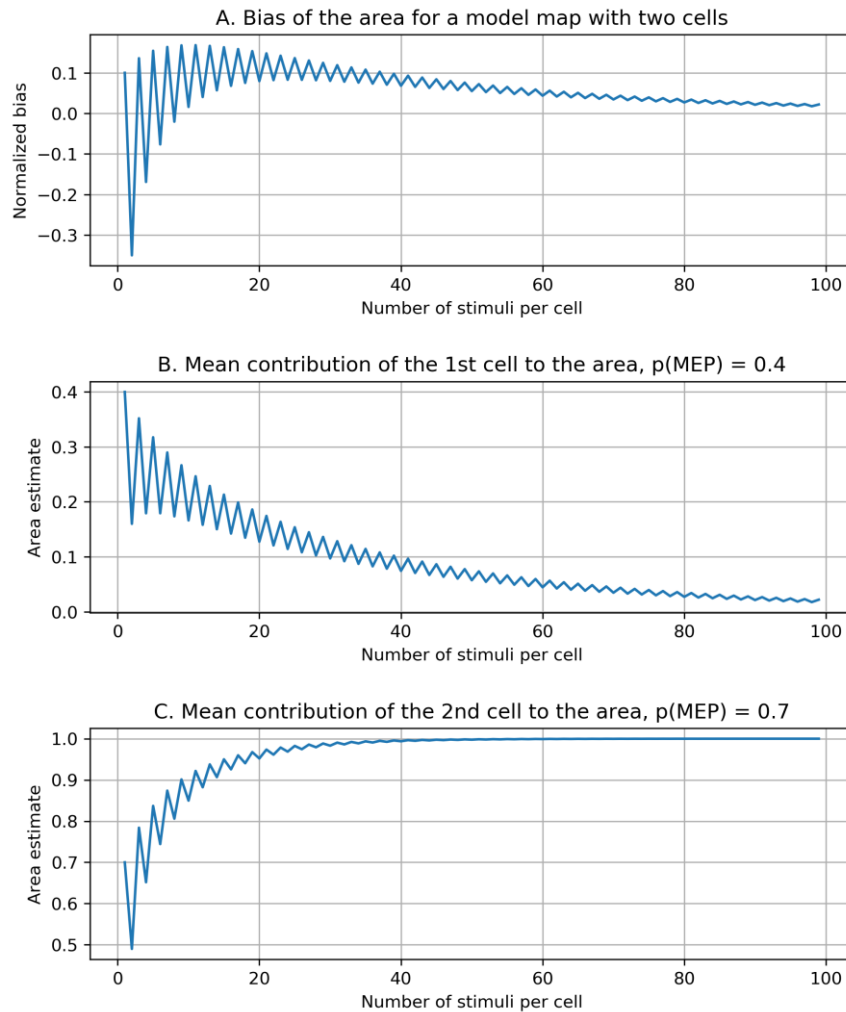

587

588 **Figure 14.** A. Non-monotonic dependence of the bias of  $A_{\text{half}}$  (the area of the cells with more than half suprathreshold  
589 MEPs) on the number of stimuli per cell. The bias is calculated for a model muscle representation consisting of two grid  
590 cells with the probabilities of suprathreshold MEPs equal to 0.4 and 0.7. B. Contribution of the first cell to the estimate of  
591  $A_{\text{half}}$ . C. Contribution of the second cell to the estimate of  $A_{\text{half}}$ .

592

593 It is important to note that the decrease of the absolute value of the bias in Fig. 14A is slow. Reducing the bias  
594 to below 0.1 requires approximately 40 stimuli per cell, which is arguably impractical for real mapping with a  
595 considerable number of grid cells. The slow decrease is related to the presence of cells with probabilities of  
596 suprathreshold MEPs not far from the threshold probability (0.4 and 0.5 in the considered case). The TMS map  
597 visualizations in Fig. 2A indicate that the cells cover the whole span of MEP probability. Thus, the definitions  
598 of the representation area based on a threshold on the fraction of positive MEPs (such as  $A_{\text{half}}$ ) can generally  
599 produce considerable subject-dependent biases and should be used with caution, especially regarding the  
600 interpretation of group comparisons, as well as area estimates obtained with different numbers of stimuli per  
601 cell.

602

## 603 References

604 1. Rotenberg, A.; Horvath, J.C.; Pascual-Leone, A. *Transcranial Magnetic Stimulation*; Humana Press: New York,  
605 2014; ISBN 978-1-4939-0878-3.

606 2. Wittenberg, G.F. Experience, cortical remapping, and recovery in brain disease. *Neurobiol. Dis.* **2010**, *37*, 252–  
607 258.

608 3. Di Lazzaro, V.; Ziemann, U. The contribution of transcranial magnetic stimulation in the functional evaluation of

- 609 microcircuits in human motor cortex. *Front. Neural Circuits* **2013**, *7*.
- 610 4. Tarapore, P.E.; Tate, M.C.; Findlay, A.M.; Honma, S.M.; Mizuiri, D.; Berger, M.S.; Nagarajan, S.S. Preoperative  
611 multimodal motor mapping: a comparison of magnetoencephalography imaging, navigated transcranial magnetic  
612 stimulation, and direct cortical stimulation. *J. Neurosurg.* **2012**, *117*, 354–362.
- 613 5. Picht, T.; Frey, D.; Thieme, S.; Kliesch, S.; Vajkoczy, P. Presurgical navigated TMS motor cortex mapping  
614 improves outcome in glioblastoma surgery: a controlled observational study. *J. Neurooncol.* **2016**, *126*, 535–543.
- 615 6. Ziemann, U.; Ilić, T. V.; Jung, P. Chapter 3 Long-term potentiation (LTP)-like plasticity and learning in human  
616 motor cortex – investigations with transcranial magnetic stimulation (TMS). *Suppl. Clin. Neurophysiol.* **2006**, *59*,  
617 19–25.
- 618 7. Boudreau, S.A.; Lontis, E.R.; Caltenco, H.; Svensson, P.; Sessle, B.J.; Struijk, L.N.A.; Arendt-Nielsen, L. Features  
619 of cortical neuroplasticity associated with multidirectional novel motor skill training: A TMS mapping study. *Exp.*  
620 *Brain Res.* **2013**.
- 621 8. Pascual-Leone, A.; Nguyet, D.; Cohen, L.G.; Brasil-Neto, J.P.; Cammarota, A.; Hallett, M. Modulation of muscle  
622 responses evoked by transcranial magnetic stimulation during the acquisition of new fine motor skills. *J.*  
623 *Neurophysiol.* **1995**, *74*, 1037–1045.
- 624 9. Raffin, E.; Siebner, H.R. Use-Dependent Plasticity in Human Primary Motor Hand Area: Synergistic Interplay  
625 Between Training and Immobilization. *Cereb. Cortex* **2019**, *29*, 356–371.
- 626 10. Lüdemann-Podubeká, J.; Nowak, D.A. Mapping cortical hand motor representation using TMS: A method to  
627 assess brain plasticity and a surrogate marker for recovery of function after stroke? *Neurosci. Biobehav. Rev.* **2016**,  
628 *69*, 239–251.
- 629 11. Schabrun, S.M.; Stinear, C.M.; Byblow, W.D.; Ridding, M.C. Normalizing Motor Cortex Representations in Focal  
630 Hand Dystonia. *Cereb. Cortex* **2009**, *19*, 1968–1977.
- 631 12. Freund, P.; Rothwell, J.; Craggs, M.; Thompson, A.J.; Bestmann, S. Corticomotor representation to a human  
632 forearm muscle changes following cervical spinal cord injury. *Eur. J. Neurosci.* **2011**, *34*, 1839–1846.
- 633 13. Cortes, M.; Thickbroom, G.W.; Elder, J.; Rykman, A.; Valls-Sole, J.; Pascual-Leone, A.; Edwards, D.J. The  
634 corticomotor projection to liminally-contractable forearm muscles in chronic spinal cord injury: a transcranial  
635 magnetic stimulation study. *Spinal Cord* **2017**, *55*, 362–366.
- 636 14. Chervyakov, A. V.; Bakulin, I.S.; Savitskaya, N.G.; Arkhipov, I. V.; Gavrilov, A. V.; Zakharova, M.N.; Piradov,  
637 M.A. Navigated transcranial magnetic stimulation in amyotrophic lateral sclerosis. *Muscle Nerve* **2015**, *51*, 125–  
638 131.
- 639 15. Liepert, J.; Graef, S.; Uhde, I.; Leidner, O.; Weiller, C. Training-induced changes of motor cortex representations  
640 in stroke patients. *Acta Neurol. Scand.* **2000**, *101*, 321–6.
- 641 16. Weiss, C.; Nettekoven, C.; Rehme, A.K.; Neuschmelting, V.; Eisenbeis, A.; Goldbrunner, R.; Grefkes, C. Mapping  
642 the hand, foot and face representations in the primary motor cortex - Retest reliability of neuronavigated TMS

- 643 versus functional MRI. *Neuroimage* **2013**, *66*, 531–542.
- 644 17. Kraus, D.; Gharabaghi, A. Neuromuscular Plasticity: Disentangling Stable and Variable Motor Maps in the Human  
645 Sensorimotor Cortex. *Neural Plast.* **2016**, *2016*.
- 646 18. Pellegrini, M.; Zoghi, M.; Jaberzadeh, S. The effect of transcranial magnetic stimulation test intensity on the  
647 amplitude, variability and reliability of motor evoked potentials. *Brain Res.* **2018**, *1700*, 190–198.
- 648 19. Julkunen, P. Methods for estimating cortical motor representation size and location in navigated transcranial  
649 magnetic stimulation. *J. Neurosci. Methods* **2014**, *232*, 125–133.
- 650 20. Classen, J.; Knorr, U.; Werhahn, K.J.; Schlaug, G.; Kunesch, E.; Cohen, L.G.; Seitz, R.J.; Benecke, R. Multimodal  
651 output mapping of human central motor representation on different spatial scales. *J. Physiol.* **1998**, *512 ( Pt 1)*,  
652 163–79.
- 653 21. Kleim, J.A.; Kleim, E.D.; Cramer, S.C. Systematic assessment of training-induced changes in corticospinal output  
654 to hand using frameless stereotaxic transcranial magnetic stimulation. *Nat. Protoc.* **2007**.
- 655 22. Uy, J.; Ridding, M.C.; Miles, T.S. Stability of maps of human motor cortex made with transcranial magnetic  
656 stimulation. *Brain Topogr.* **2002**, *14*, 293–297.
- 657 23. Corneal, S.F.; Butler, A.J.; Wolf, S.L. Intra- and intersubject reliability of abductor pollicis brevis muscle motor  
658 map characteristics with transcranial magnetic stimulation. *Arch. Phys. Med. Rehabil.* **2005**, *86*, 1670–1675.
- 659 24. McGregor, K.M.; Carpenter, H.; Kleim, E.; Sudhyadhom, A.; White, K.D.; Butler, A.J.; Kleim, J.; Crosson, B.  
660 Motor map reliability and aging: A TMS/fMRI study. *Exp. Brain Res.* **2012**, *219*, 97–106.
- 661 25. Ngomo, S.; Leonard, G.; Moffet, H.; Mercier, C. Comparison of transcranial magnetic stimulation measures  
662 obtained at rest and under active conditions and their reliability. *J. Neurosci. Methods* **2012**, *205*, 65–71.
- 663 26. Cavaleri, R.; Schabrun, S.M.; Chipchase, L.S. The number of stimuli required to reliably assess corticomotor  
664 excitability and primary motor cortical representations using transcranial magnetic stimulation (TMS): a systematic  
665 review and meta-analysis. *Syst. Rev.* **2017**, *6*, 48.
- 666 27. Forster, M.-T.; Limbart, M.; Seifert, V.; Senft, C. Test-retest Reliability of Navigated Transcranial Magnetic  
667 Stimulation of the Motor Cortex. *Oper. Neurosurg.* **2014**, *10*, 51–56.
- 668 28. Schönfeldt-Lecuona, C.; Thielscher, A.; Freudenmann, R.W.; Kron, M.; Spitzer, M.; Herwig, U. Accuracy of  
669 stereotaxic positioning of transcranial magnetic stimulation. *Brain Topogr.* **2005**, *17*, 253–9.
- 670 29. Julkunen, P.; Säisänen, L.; Danner, N.; Niskanen, E.; Hukkanen, T.; Mervaala, E.; Könönen, M. Comparison of  
671 navigated and non-navigated transcranial magnetic stimulation for motor cortex mapping, motor threshold and  
672 motor evoked potentials. *Neuroimage* **2009**, *44*, 790–795.
- 673 30. Opitz, A.; Windhoff, M.; Heidemann, R.M.; Turner, R.; Thielscher, A. How the brain tissue shapes the electric  
674 field induced by transcranial magnetic stimulation. *Neuroimage* **2011**, *58*, 849–859.



- 675 31. Opitz, A.; Zafar, N.; Bockermann, V.; Rohde, V.; Paulus, W. Validating computationally predicted TMS  
676 stimulation areas using direct electrical stimulation in patients with brain tumors near precentral regions.  
677 *NeuroImage Clin.* **2014**, *4*, 500–507.
- 678 32. Raffin, E.; Pellegrino, G.; Di Lazzaro, V.; Thielscher, A.; Siebner, H.R. Bringing transcranial mapping into shape:  
679 Sulcus-aligned mapping captures motor somatotopy in human primary motor hand area. *Neuroimage* **2015**, *120*,  
680 164–175.
- 681 33. Zrenner, C.; Desideri, D.; Belardinelli, P.; Ziemann, U. Real-time EEG-defined excitability states determine  
682 efficacy of TMS-induced plasticity in human motor cortex. *Brain Stimul.* **2018**, *11*, 374–389.
- 683 34. Brasil-Neto, J.P.; McShane, L.M.; Fuhr, P.; Hallett, M.; Cohen, L.G. Topographic mapping of the human motor  
684 cortex with magnetic stimulation: factors affecting accuracy and reproducibility. *Electroencephalogr Clin*  
685 *Neurophysiol* **1992**, *85*, 9–16.
- 686 35. Thickbroom, G.W.; Byrnes, M.L.; Mastaglia, F.L. A model of the effect of MEP amplitude variation on the  
687 accuracy of TMS mapping. *Clin. Neurophysiol.* **1999**, *110*, 941–943.
- 688 36. Van De Ruit, M.; Perenboom, M.J.L.; Grey, M.J. TMS brain mapping in less than two minutes. *Brain Stimul.* **2015**,  
689 *8*, 231–239.
- 690 37. Novikov, P.A.; Nazarova, M.A.; Nikulin, V. V TMSmap - Software for Quantitative Analysis of TMS Mapping  
691 Results. *Front. Hum. Neurosci.* **2018**, *12*, 239.
- 692 38. Pitkänen, M.; Kallioniemi, E.; Julkunen, P.; Nazarova, M.; Nieminen, J.O.; Ilmoniemi, R.J. Minimum-Norm  
693 Estimation of Motor Representations in Navigated TMS Mappings. *Brain Topogr.* **2017**, *30*, 711–722.
- 694 39. Oldfield, R.C. The assessment and analysis of handedness: The Edinburgh inventory. *Neuropsychologia* **1971**, *9*,  
695 97–113.
- 696 40. Jonker, Z.D.; Vliet, R. Van Der; Hauwert, C.M.; Gaiser, C.; Joke, H.M.; Geest, J.N. Van Der; Donchin, O.; Ribbers,  
697 G.M.; Frens, M.A.; Selles, R.W. TMS motor mapping: comparing the absolute reliability of digital reconstruction  
698 methods to the golden standard. *Brain Stimul.* **2018**.
- 699 41. Efron, B. Bootstrap Methods: Another Look at the Jackknife. *Ann. Stat.* **1979**, *7*, 1–26.
- 700 42. Hollander, M.; Wolfe, D.A. *Nonparametric statistical methods*; Wiley, 1999; ISBN 0471190454.
- 701 43. Gehan, E.A. A Generalized Wilcoxon Test for Comparing Arbitrarily Singly-Censored Samples. *Biometrika* **1965**,  
702 *52*, 203.
- 703 44. Flandin, G.; Friston, K. Statistical parametric mapping (SPM). *Scholarpedia* **2008**, *3*, 6232.
- 704 45. McGraw, K.O.; Wong, S.P. Forming inferences about some intraclass correlation coefficients. *Psychol. Methods*  
705 **1996**, *1*, 30–46.
- 706 46. Goetz, S.M.; Luber, B.; Lisanby, S.H.; Peterchev, A. V. A novel model incorporating two variability sources for

- 707           describing motor evoked potentials. *Brain Stimul.* **2014**, 7, 541–552.
- 708   47.   Cavaleri, R.; Schabrun, S.M.; Chipchase, L.S. The reliability and validity of rapid transcranial magnetic stimulation  
709   mapping. *Brain Stimul.* **2018**, 1–5.
- 710   48.   Mortifee, P.; Stewart, H.; Schulzer, M.; Eisen,   a Reliability of transcranial magnetic stimulation for mapping the  
711   human motor cortex. *Electroencephalogr. Clin. Neurophysiol.* **1994**, 93, 131–7.
- 712
- 713
